# Supplementary material for: A double decker type complex: copper(i) iodide complexation with mixed donor macrocycles via [1 : 1] and [2 : 2] cyclisations
Source: Royal Society of Chemistry journal article supplement (doi:10.1039/c5dt03751d), 2015-12-02
Supplement: c5dt03751d1.pdf [file c5dt03751d1.pdf]

## Electronic supplementary information

### **A double decker type complex: copper(I) iodide complexation with mixed donor macrocycles via [1:1] and [2:2] cyclisations**

Yunji Kang,<sup>a</sup> In-Hyeok Park,<sup>\*a</sup> Mari Ikeda,<sup>b</sup> Yoichi Habata<sup>c</sup> and Shim Sung Lee<sup>\*a</sup>

<sup>a</sup> Department of Chemistry and Research Institute of Natural Science, Gyeongsang National University, Jinju 660-701, S. Korea

<sup>b</sup> Education Center, Faculty of Engineering, Chiba Institute of Technology, 2-1-1 Shibazono, Narashino, Chiba 275-0023, Japan

<sup>c</sup> Department of Chemistry, Toho University, 2-2-1 Miyama, Funabashi, Chiba 274-8510, Japan

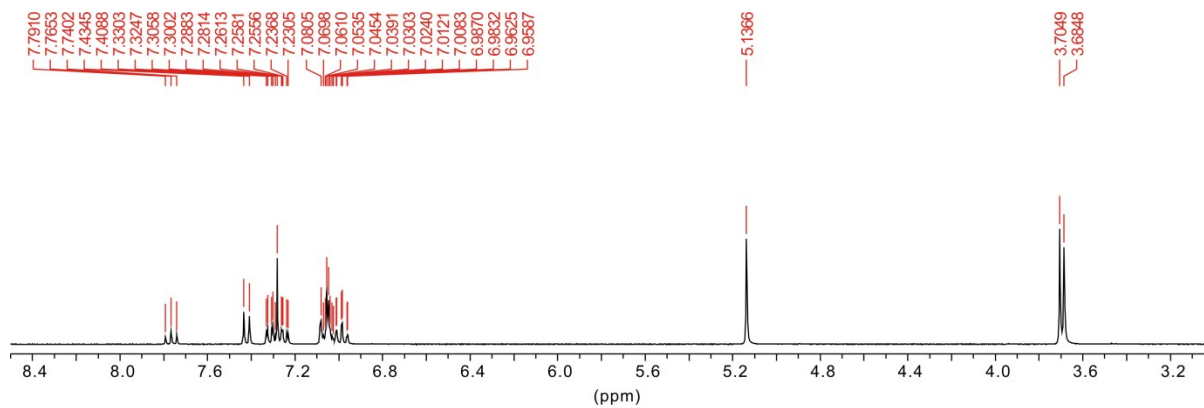

(a)

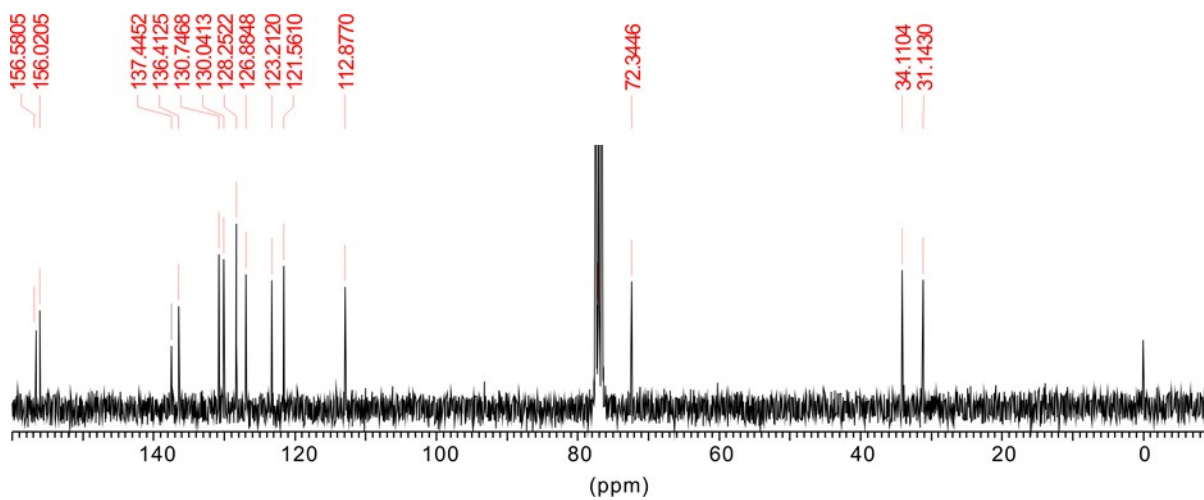

(b)

**Fig. S1** (a)  $^1\text{H}$  and (b)  $^{13}\text{C}$  NMR spectra of  $\text{L}^1$  in  $\text{CDCl}_3$ .

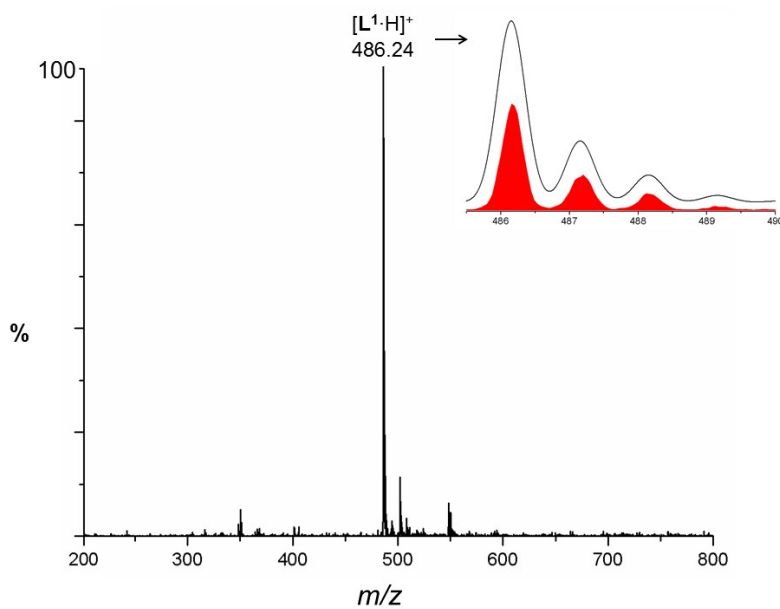

**Fig. S2** ESI-mass spectrum of  $\text{L}^1$ .

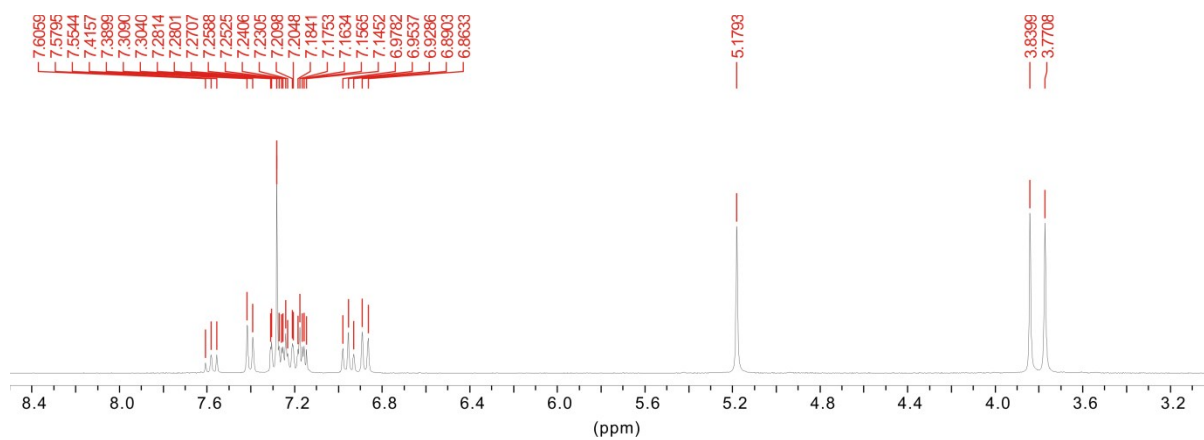

(a)

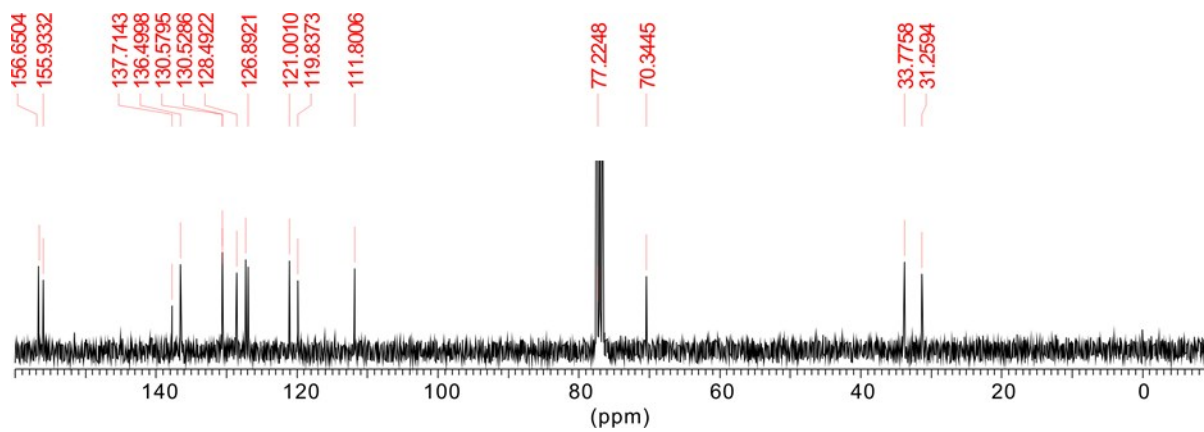

(b)

**Fig. S3** (a)  $^1\text{H}$  and (b)  $^{13}\text{C}$  NMR spectra of  $\text{L}^2$  in  $\text{CDCl}_3$ .

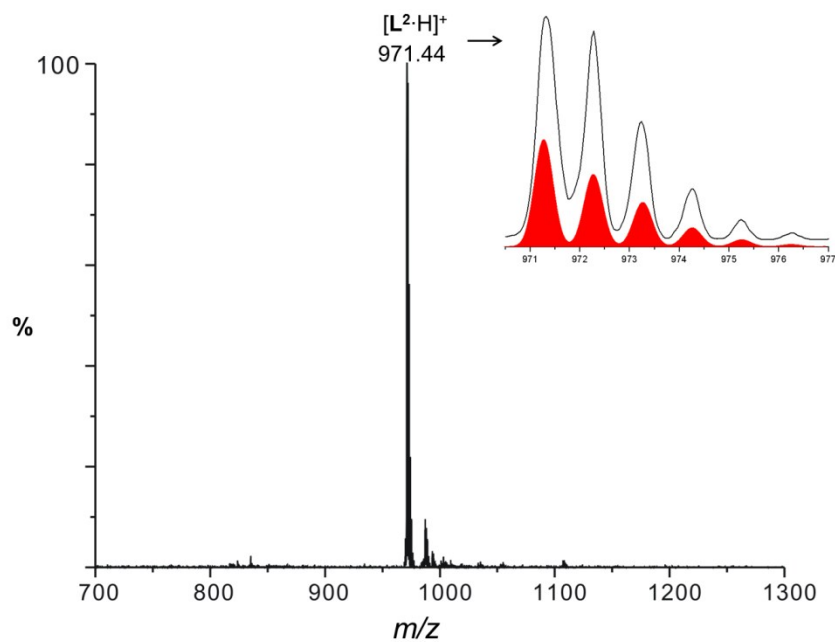

**Fig. 4** ESI-mass spectrum of  $\text{L}^2$ .

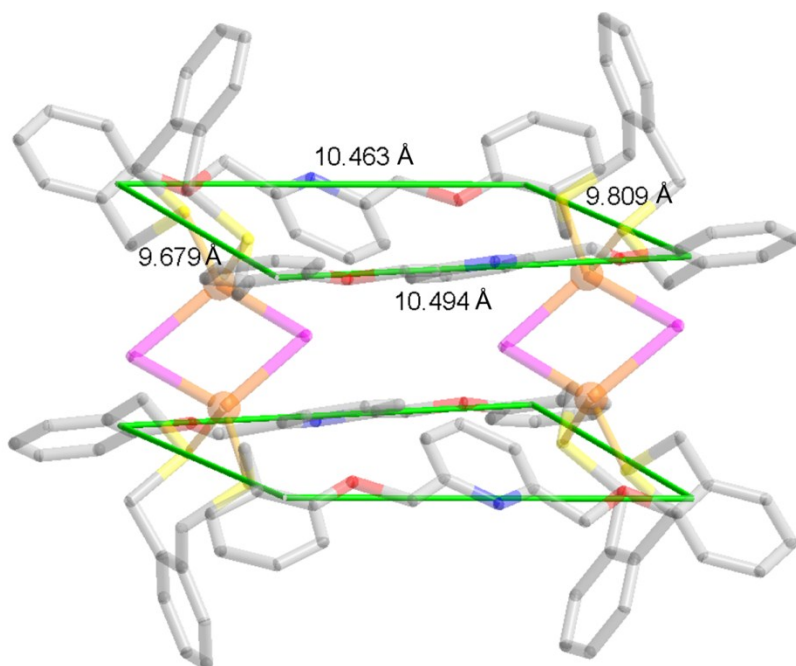

**Fig. S5** The rectangular configuration of  $L^2$  with one nanometer square area in **2a**.

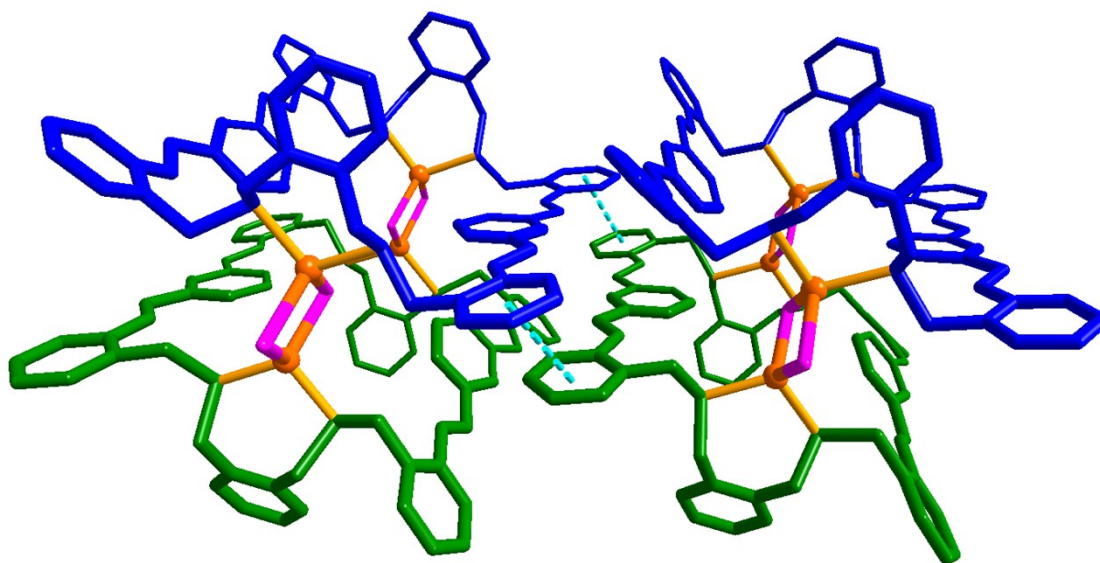

**Fig. S6** Intermolecular  $\pi$ - $\pi$  stacking interaction (centroid-centroid distance 4.47 Å, dotted lines) in the packing structure of **2a**.

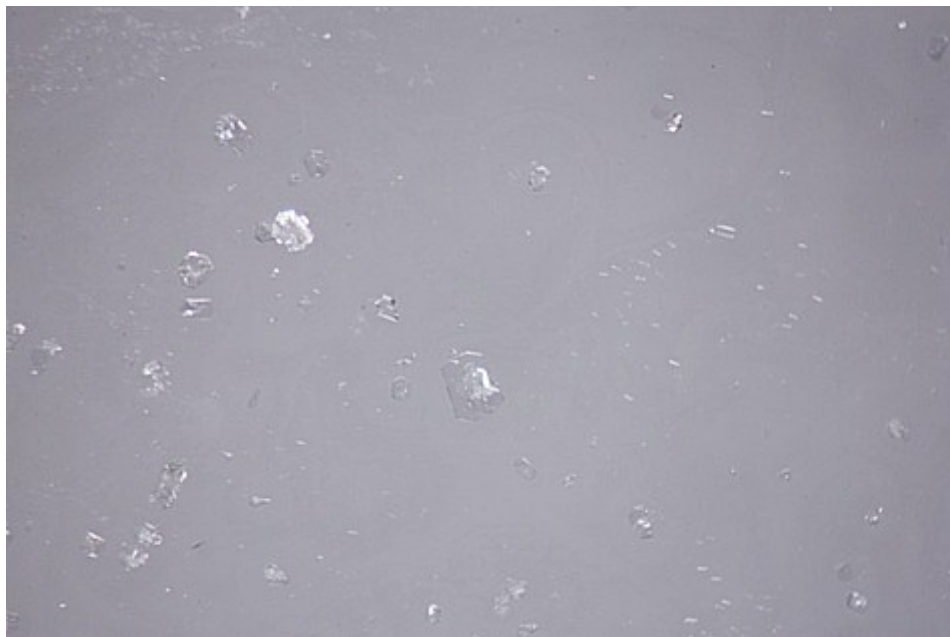

(a)

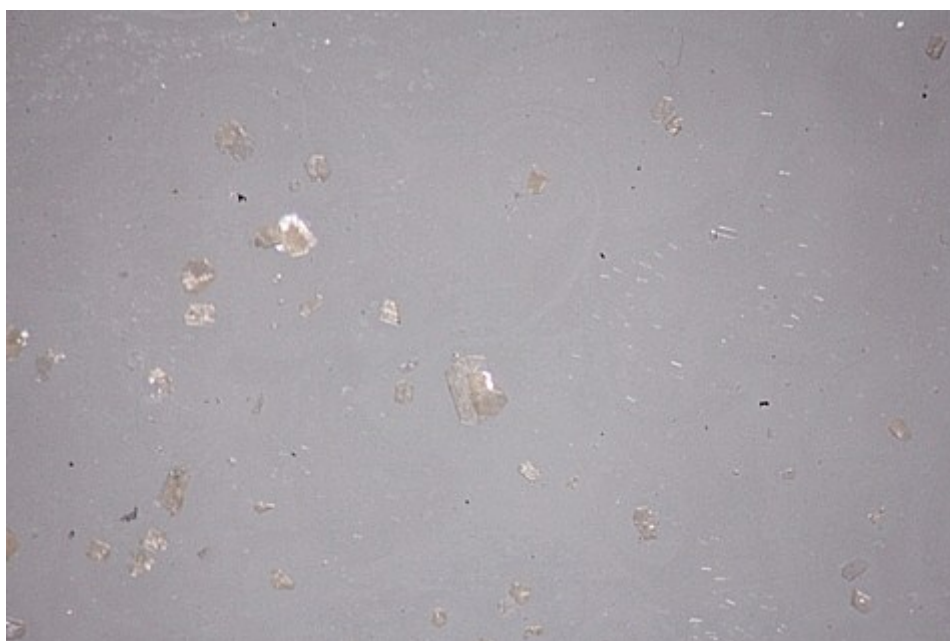

(b)

**Fig. S7** Photographs of (a) **2a** (colourless, fresh crystals) and (b) **2b** (pale yellow, the same crystals of **2a** but after 3 days).

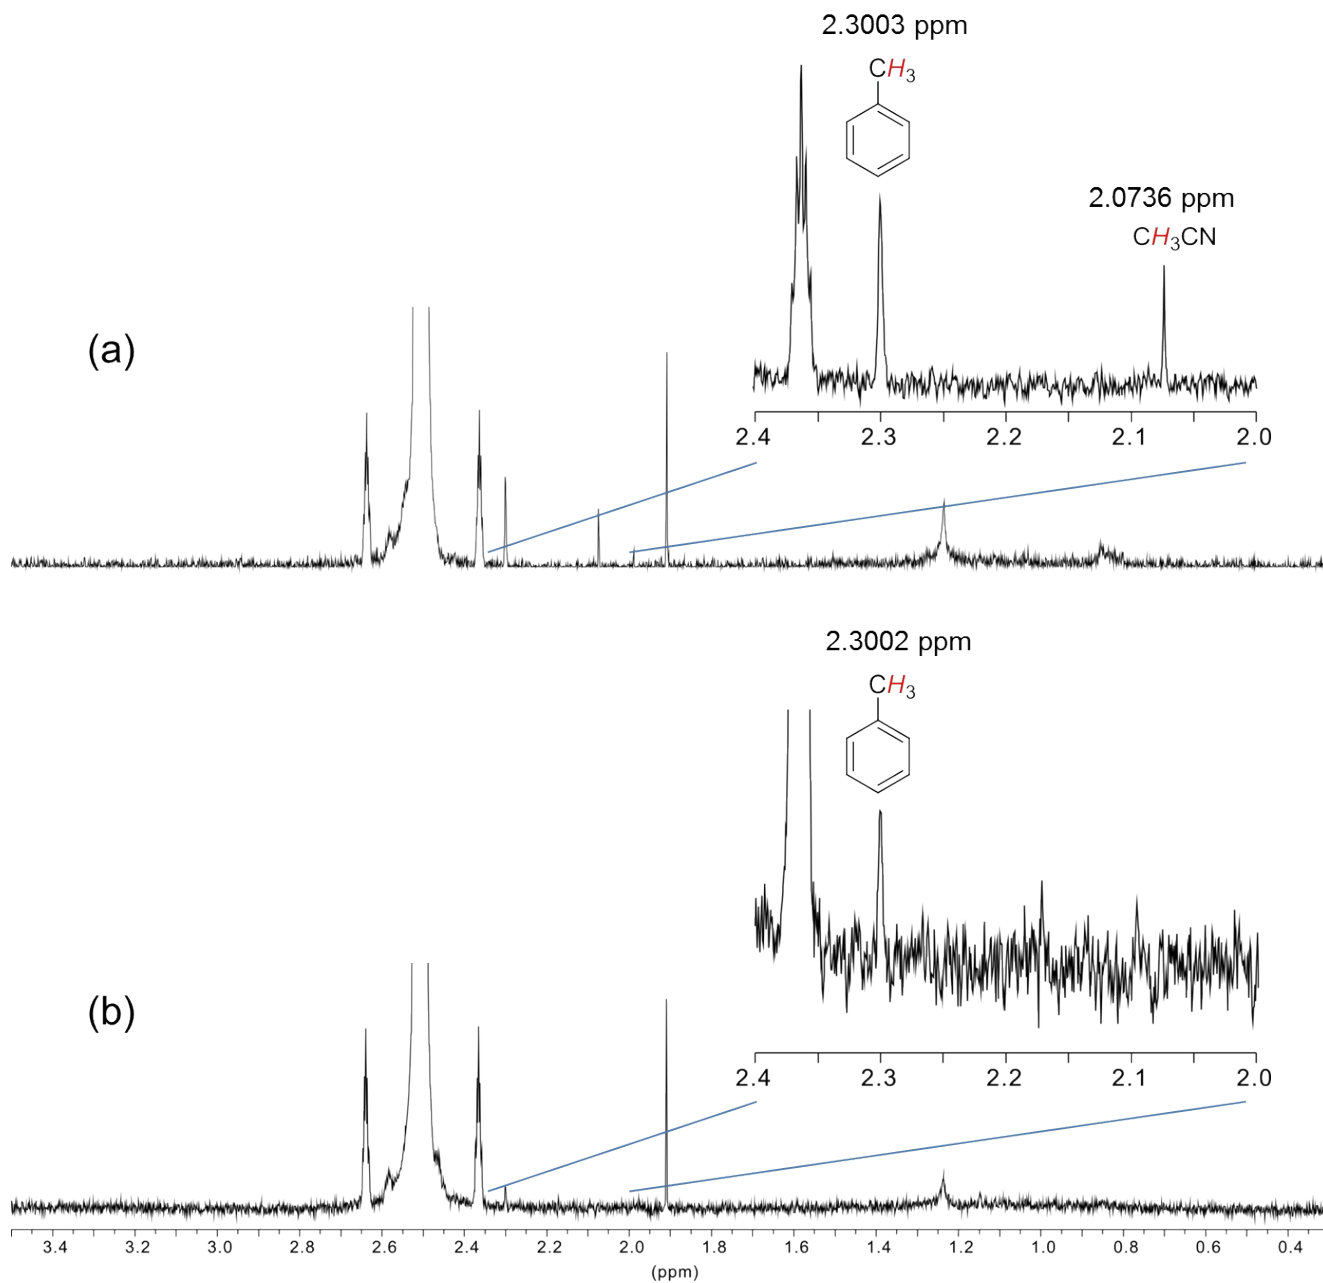

**Fig. S8** <sup>1</sup>H NMR (500 MHz) spectra of (a) **2a** and (b) **2b** in DMSO-*d*<sub>6</sub> with small drops of HNO<sub>3</sub> to dissolve each crystalline sample. From the comparison of the two spectra, it was confirmed that the acetonitrile molecules in **2a** (singlet at 2.0736 ppm) were removed in **2b**.

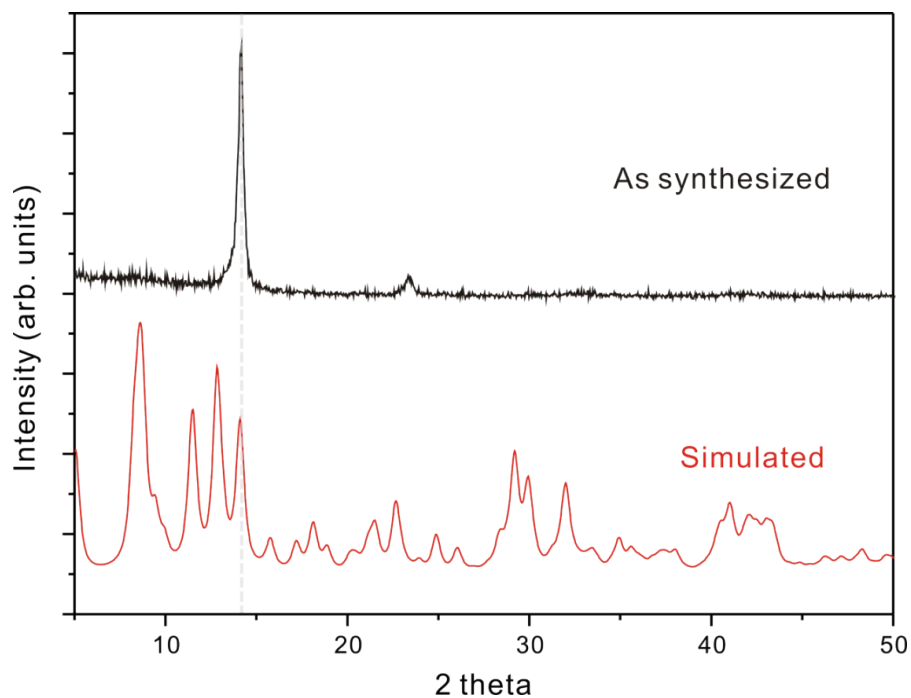

**Fig. S9** PXR D patterns for **2a**: (top) as synthesized and (bottom) simulated from the single crystal X-ray data. The simple patterns and intensity variations for the synthesized sample compared to the simulated one are mainly due to the flexible nature of the product.<sup>S1-S3</sup>

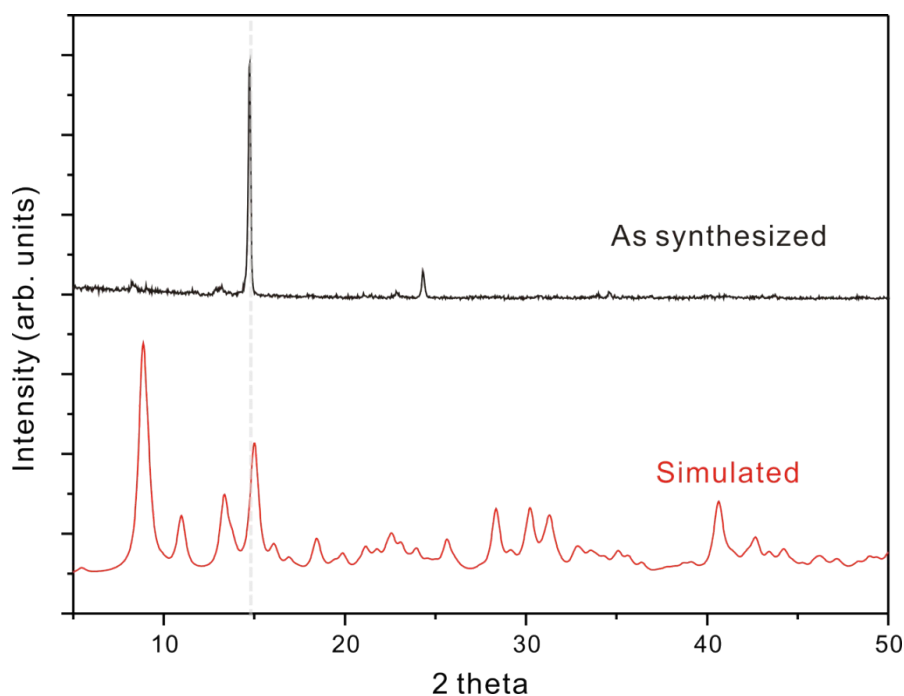

**Fig. S10** PXR D patterns for **2b**: (top) as synthesized and (bottom) simulated from the single crystal X-ray data. The simple patterns and intensity variations for the synthesized sample compared to the simulated one are mainly due to the flexible nature of the product.<sup>S1-S3</sup>

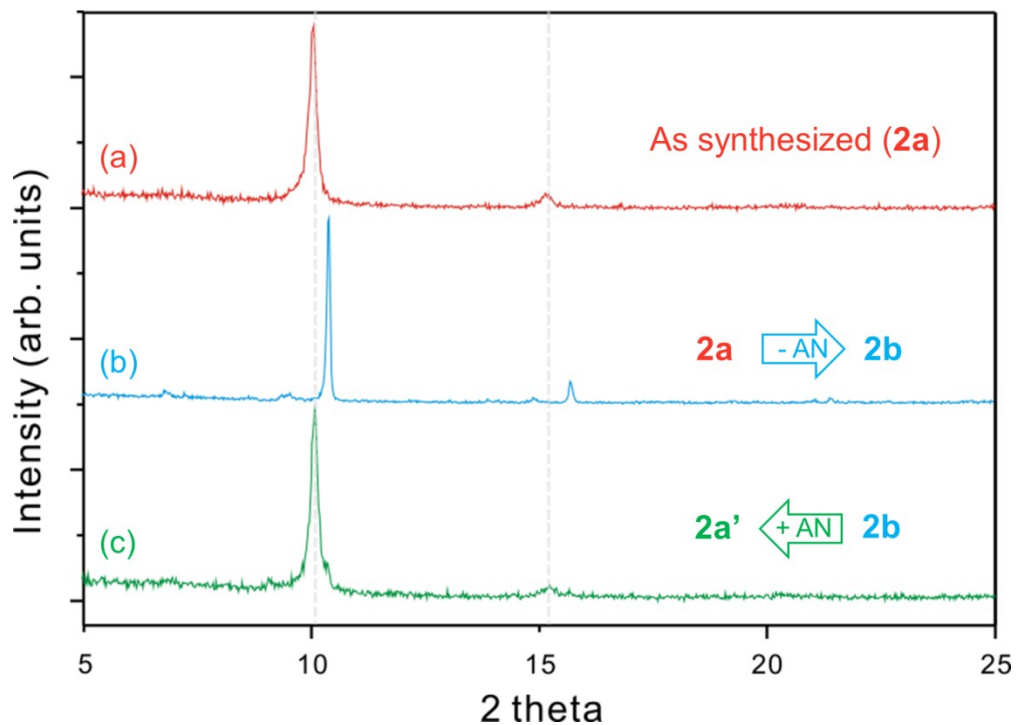

**Fig. 11** PXRD patterns for (a) **2a** (fresh crystals), (b) **2b** (acetonitrile-free crystals of **2a**) and (c) **2a'** (crystals of **2b** exposed to acetonitrile).

#### References:

- S1. J. Duan, M. Higuchi, M. L. Foo, S. Horike, K. P. Rao and S. Kitagawa, *Inorg. Chem.*, 2013, **52**, 8244.
- S2. S. Henke, R. Schmid, J.-D. Grunwaldt and R. A. Fischer, *Chem. Eur. J.*, 2010, **16**, 14296.
- S3. W. Kaneko, M. Ohba and S. Kitagawa, *J. Am. Chem. Soc.*, 2007, **129**, 13706.



**Table S1** Crystallographic data and refinement parameters

|                                                                                      | <b>1</b>                                                                        | <b>2a</b>                                                                                                     | <b>2b</b>                                                                                                     |
|--------------------------------------------------------------------------------------|---------------------------------------------------------------------------------|---------------------------------------------------------------------------------------------------------------|---------------------------------------------------------------------------------------------------------------|
| formula                                                                              | C <sub>33</sub> H <sub>37</sub> CuI <sub>3</sub> NO <sub>3</sub> S <sub>2</sub> | C <sub>116</sub> H <sub>108</sub> Cu <sub>4</sub> I <sub>4</sub> N <sub>4</sub> O <sub>8</sub> S <sub>8</sub> | C <sub>116</sub> H <sub>108</sub> Cu <sub>4</sub> I <sub>4</sub> N <sub>4</sub> O <sub>8</sub> S <sub>8</sub> |
| formula weight                                                                       | 1004.00                                                                         | 2704.30                                                                                                       | 2704.30                                                                                                       |
| crystal system                                                                       | Monoclinic                                                                      | Triclinic                                                                                                     | Triclinic                                                                                                     |
| space group                                                                          | <i>P</i> 2 <sub>1</sub> / <i>n</i>                                              | <i>P</i> -1                                                                                                   | <i>P</i> -1                                                                                                   |
| <i>a</i> (Å)                                                                         | 8.7764(2)                                                                       | 14.5063(18)                                                                                                   | 14.275(3)                                                                                                     |
| <i>b</i> (Å)                                                                         | 13.5763(3)                                                                      | 15.144(2)                                                                                                     | 14.778(3)                                                                                                     |
| <i>c</i> (Å)                                                                         | 30.1113(6)                                                                      | 18.221(3)                                                                                                     | 18.504(3)                                                                                                     |
| $\alpha$ (°)                                                                         | 90                                                                              | 98.408(10)                                                                                                    | 109.751(11)                                                                                                   |
| $\beta$ (°)                                                                          | 98.3400(10)                                                                     | 96.873(9)                                                                                                     | 93.682(11)                                                                                                    |
| $\gamma$ (°)                                                                         | 90                                                                              | 118.076(8)                                                                                                    | 116.299(10)                                                                                                   |
| <i>V</i> (Å <sup>3</sup> )                                                           | 3549.85                                                                         | 3411.4(8)                                                                                                     | 3186.1(10)                                                                                                    |
| <i>Z</i>                                                                             | 4                                                                               | 1                                                                                                             | 1                                                                                                             |
| <i>D</i> <sub>calc</sub> (g/cm <sup>3</sup> )                                        | 1.879                                                                           | 1.316                                                                                                         | 1.409                                                                                                         |
| $\mu$ (mm <sup>-1</sup> )                                                            | 3.375                                                                           | 1.690                                                                                                         | 1.814                                                                                                         |
| 2 $\theta$ <sub>max</sub> (°)                                                        | 52.00                                                                           | 52.00                                                                                                         | 52.00                                                                                                         |
| reflections collected                                                                | 53917                                                                           | 40212                                                                                                         | 69740                                                                                                         |
| independent reflections                                                              | 6946 [ <i>R</i> <sub>int</sub> = 0.0299]                                        | 13118 [ <i>R</i> <sub>int</sub> = 0.1230]                                                                     | 12323 [ <i>R</i> <sub>int</sub> = 0.0773]                                                                     |
| goodness-of-fit on <i>F</i> <sup>2</sup>                                             | 1.162                                                                           | 1.126                                                                                                         | 1.148                                                                                                         |
| <i>R</i> <sub>1</sub> , <i>wR</i> <sub>2</sub> [ <i>I</i> > 2 $\sigma$ ( <i>I</i> )] | 0.0251, 0.0448                                                                  | 0.1437, 0.3599                                                                                                | 0.1099, 0.3211                                                                                                |
| <i>R</i> <sub>1</sub> , <i>wR</i> <sub>2</sub> (all data)                            | 0.0331, 0.0470                                                                  | 0.2566, 0.3946                                                                                                | 0.2027, 0.3614                                                                                                |

**Table S2** Selected bond distances (Å) and bond angles (°) for **1**

|            |             |            |           |
|------------|-------------|------------|-----------|
| Cu1-N1     | 2.038(2)    | Cu1-S1     | 2.2660(8) |
| Cu1-S2     | 2.2997(8)   | Cu1-O1     | 2.610(2)  |
| Cu1-O2     | 2.726(2)    |            |           |
| I1-I2-I3   | 177.089(10) | S1-Cu1-S2  | 115.31(3) |
| S1-Cu1- N1 | 122.56(7)   | S2-Cu1- N1 | 122.03(7) |

**Table S3** Selected bond distances (Å) and bond angles (°) for **2a** and **2b<sup>a</sup>**

|              | <b>2a</b>  | <b>2b</b>  |
|--------------|------------|------------|
| Cu1-Cu2      | 2.965(3)   | 2.902(3)   |
| Cu1-I1       | 2.586(2)   | 2.680(2)   |
| Cu1-I2       | 2.698(3)   | 2.5724(18) |
| Cu1-S1       | 2.345(4)   | 2.301(4)   |
| Cu1-S2       | 2.333(4)   | 2.317(3)   |
| Cu2-I1       | 2.621(2)   | 2.598(2)   |
| Cu2-I2       | 2.685(3)   | 2.762(2)   |
| Cu2-S3A      | 2.337(5)   | 2.335(4)   |
| Cu2-S4A      | 2.311(5)   | 2.317(4)   |
| Cu1-I1-Cu2   | 69.41(8)   | 68.29(7)   |
| Cu1-I2-Cu2   | 66.84(7)   | 64.42(6)   |
| Cu2-Cu1-S1   | 126.97(13) | 127.78(11) |
| Cu2-Cu1-S2   | 125.95(13) | 123.34(11) |
| Cu2-Cu1-I1   | 55.86(7)   | 56.28(5)   |
| Cu2-Cu1- I2  | 56.38(7)   | 56.42(6)   |
| I1-Cu1-S1    | 114.31(14) | 114.66(10) |
| I1-Cu1-S2    | 113.14(13) | 111.18(10) |
| I2-Cu1-S1    | 105.03(14) | 105.20(10) |
| I2-Cu1-S2    | 105.10(13) | 104.32(10) |
| I1-Cu1-I2    | 112.23(9)  | 112.69(7)  |
| Cu1-Cu2-S4A  | 124.73(14) | 128.57(12) |
| Cu1-Cu2- S3A | 127.90(14) | 127.57(12) |
| Cu1-Cu2- I1  | 54.73(6)   | 55.44(5)   |
| Cu1-Cu2- I2  | 56.78(7)   | 59.16(6)   |
| I1-Cu2-S4A   | 109.56(14) | 110.52(12) |
| I1-Cu2-S3A   | 111.91(15) | 109.97(11) |
| I2-Cu2-S4A   | 106.72(15) | 108.81(13) |
| I2-Cu2-S3A   | 109.61(15) | 108.52(12) |
| I1-Cu2-I2    | 111.49(9)  | 114.60(8)  |
| S1-Cu1-S2    | 106.25(17) | 108.09(13) |
| S3A-Cu2-S4A  | 107.34(18) | 103.86(15) |

<sup>a</sup>symmetry operation: A) -x+1,-y,-z+1.
